# Supplementary material
Source: Springer Nature journal article supplement (https://www.springermedizin.de/resource/supplementary/12878_2011_56_MOESM9_ESM.pdf/9441634)

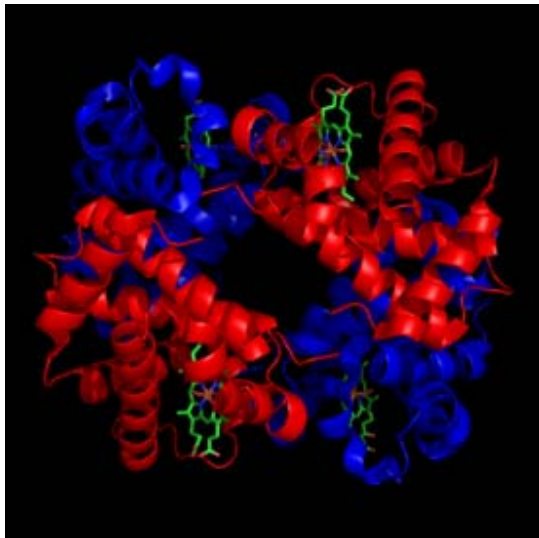

Supplement: MOESM9 [file 9441634]
